# Supplementary figures and images for: Variable admittance control with sEMG-based support for wearable wrist exoskeleton
Source: Frontiers journal article supplement (doi:10.3389/fnbot.2025.1562675), 2025-09-01

# Percentage of reached targets

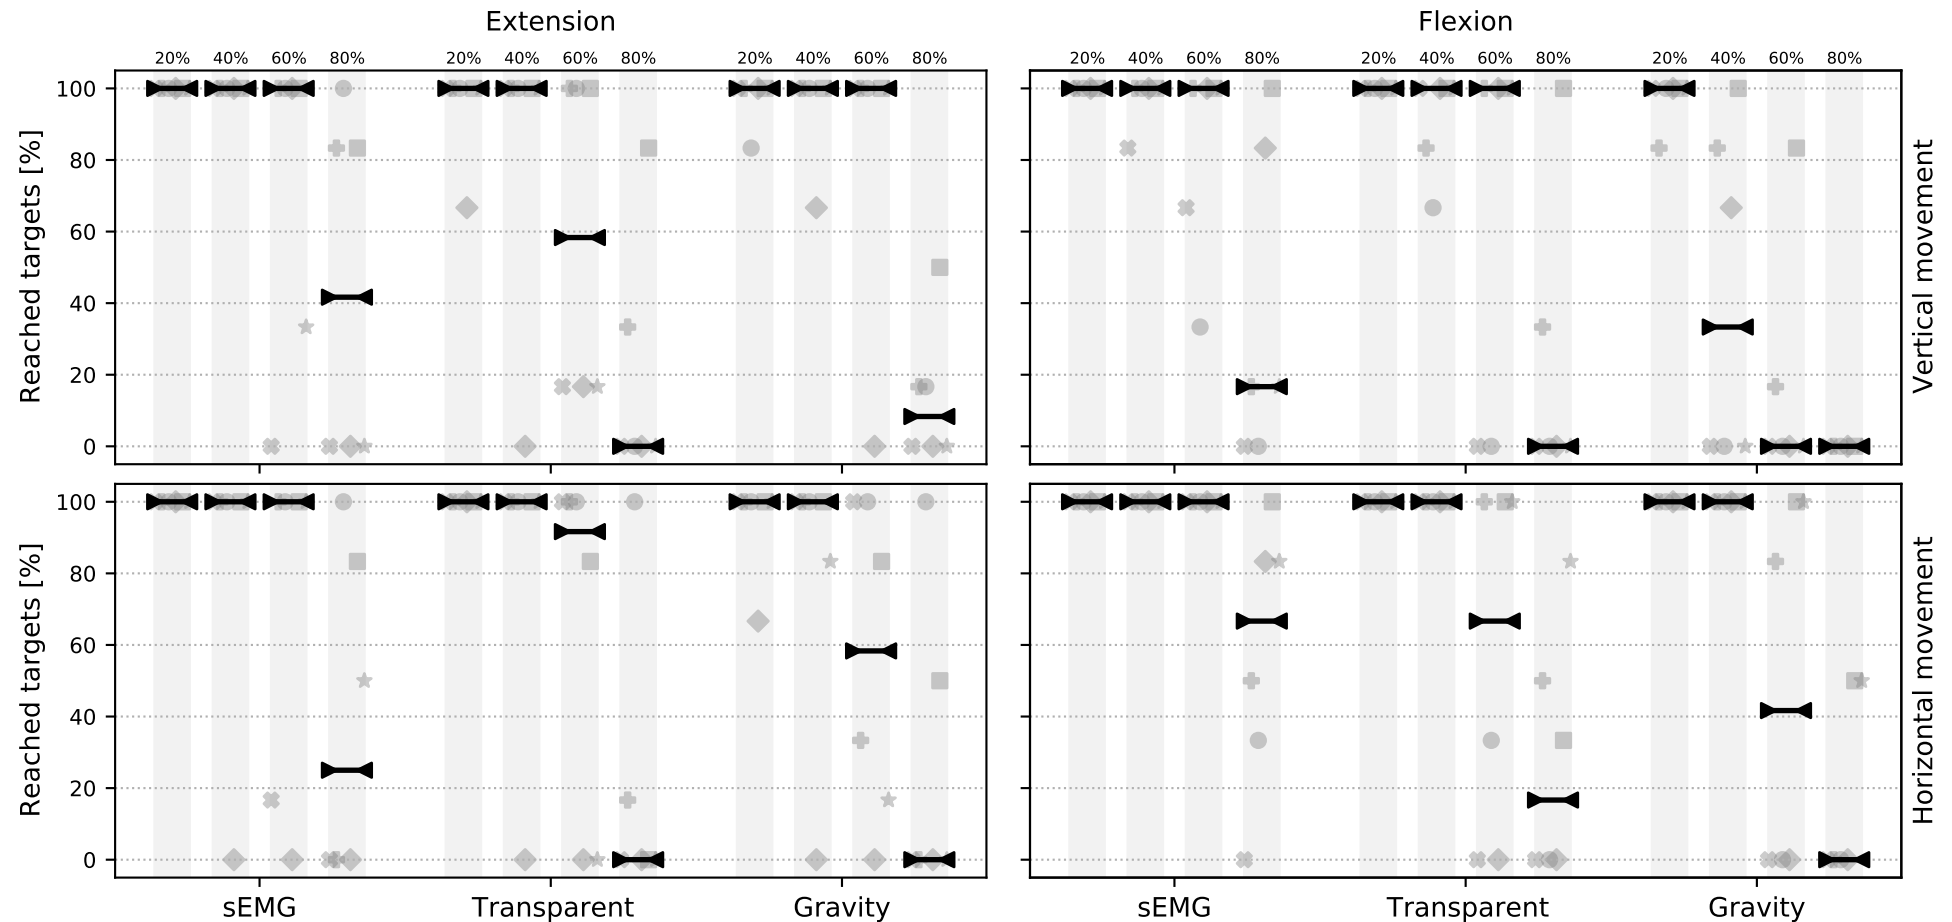

Supplement: Data_Sheet_1.zip [file Data_Sheet_1.zip]

# Normalized integrated jerk

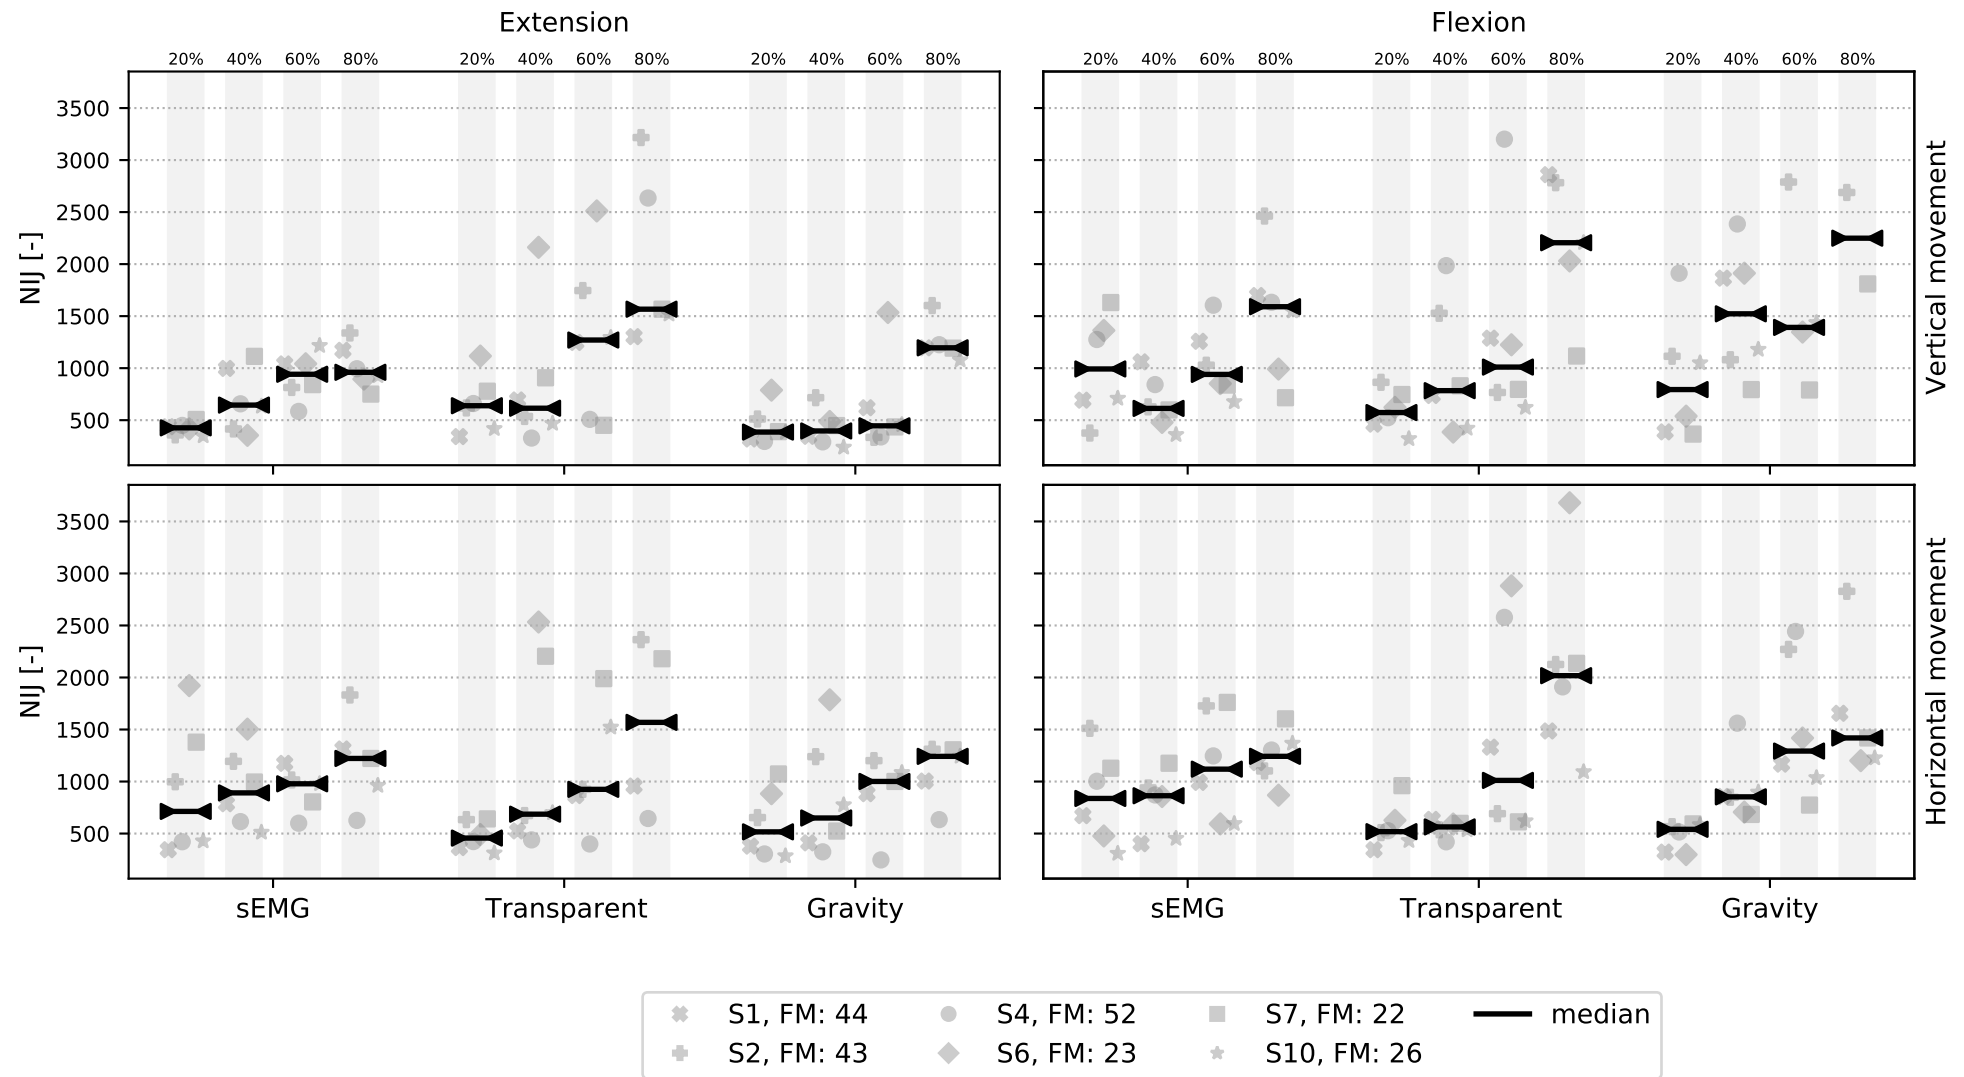

Supplement: Data_Sheet_1.zip [file Data_Sheet_1.zip]

# Ratio of co-activation level

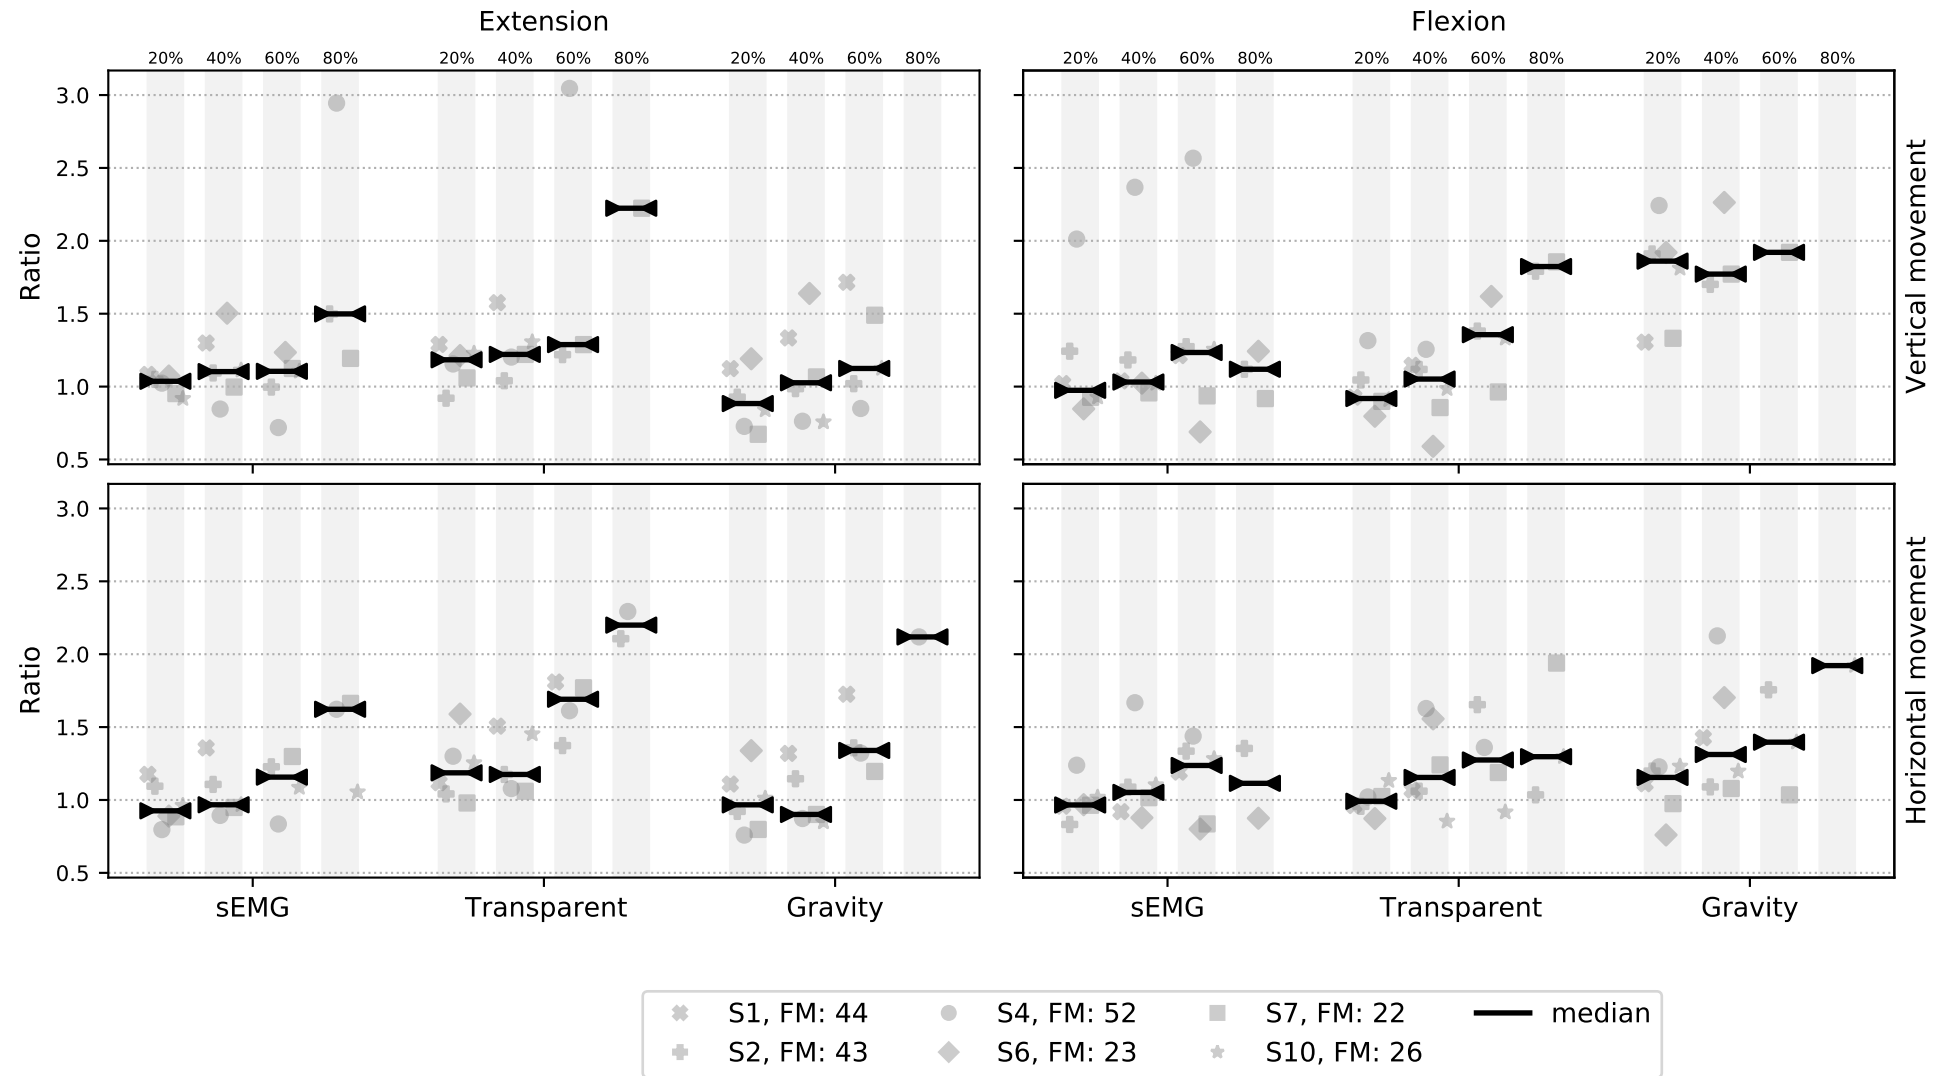

Supplement: Data_Sheet_1.zip [file Data_Sheet_1.zip]
